# Supplementary material for: The Sterolgene v0 cDNA microarray: a systemic approach to studies of cholesterol homeostasis and drug metabolism
Source: Springer Nature journal article supplement (doi:10.1186/1471-2164-9-76), 2008-02-11
Supplement: Additional file 3 [file 1471-2164-9-76-s3.pdf]

| <b>Log<sub>2</sub><br/>ratio</b> | <b>Gene name</b>                                                                 | <b>Gene Symbol</b> | <b>GeneBank<br/>Acc. No.</b> |
|----------------------------------|----------------------------------------------------------------------------------|--------------------|------------------------------|
| -1.93                            | cytochrome P450, family 2, subfamily c, polypeptide 29                           | Cyp2c29            | AA106162                     |
| -1.41                            | Histocompatibility 2, K1, K region                                               | H2-K1              | AA122791                     |
| -1.33                            | urate oxidase                                                                    | Uox                | AI551358                     |
| -1.3                             | hemopexin                                                                        | Hpxn               | AA822009                     |
| -1.11                            | serine (or cysteine) proteinase inhibitor, clade F, member 2                     | Serpinf2           | W33918                       |
| -1.05                            | similar to Cytochrome P450, family 2, subfamily a, polypeptide 12                | LOC233005          | AA238327                     |
| -0.84                            | dehydrogenase/reductase (SDR family) member 3                                    | Dhrs3              | AA881922                     |
| -0.76                            | hydroxysteroid (17-beta) dehydrogenase 2                                         | Hsd17b2            | AA027607                     |
| -0.6                             | serine (or cysteine) proteinase inhibitor, clade A, member 1e                    | Serpina1e          | W13979                       |
| -0.54                            | coagulation factor XII (Hageman factor)                                          | F12                | W34349                       |
| -0.46                            | lectin, galactose binding, soluble 9                                             | Lgals9             | AA674445                     |
| <b>-0.25</b>                     | <b>eukaryotic translation elongation factor 1 gamma</b>                          | <b>Eef1g</b>       | <b>AI549639</b>              |
| -0.21                            | ATP synthase, H <sup>+</sup> transporting mitochondrial F1 complex, beta subunit | Atp5b              | W36948                       |
| -0.18                            | dihydrolipoamide dehydrogenase                                                   | Dld                | AA245976                     |
| 0.31                             | basic transcription factor 3                                                     | Btf3               | AA688716                     |
| 0.46                             | Ribosomal protein L36a                                                           | Rpl36a             | AA600581                     |
| 0.5                              | histidine triad nucleotide binding protein 1                                     | Hint1              | AA068901                     |
| 1.13                             | RIKEN cDNA G431001E03 gene                                                       | G431001E03Rik      | AA683963                     |
